# Supplementary material for: Evolution of bitter receptor genes and ontogenetic dietary shift in a frog
Source: PubMed Central journal article supplement — Proc Natl Acad Sci U S A. 2023 Feb 13;120(8):e2218183120. doi: 10.1073/pnas.2218183120 (PMC9974469; doi:10.1073/pnas.2218183120), 2023-02-13
Supplement: pnas.2218183120.sapp.pdf [file pnas.2218183120.sapp.pdf]

**Supporting Information for**  
Evolution of bitter receptor genes and ontogenetic dietary shift in a  
frog

Xiangyu Hao, Hengwu Jiao, Dahu Zou, Qiyang Li, Xiangqun Yuan, Wenbo Liao, Peihua Jiang,  
Huabin Zhao

Correspondence to: Huabin Zhao  
Email: [huabinzhao@whu.edu.cn](mailto:huabinzhao@whu.edu.cn)

**This PDF file includes:**

Supporting text: Extended Methods  
Legends for Datasets S1 to S6  
SI References

**Other supporting materials for this manuscript include the following:**

Datasets S1 to S6

## 31 **Supporting Information Text**

### 32 **Extended methods**

33 **Identification of *Tas2r* genes of Anura.** In order to search for *Tas2rs* in the amphibian order  
34 Anura, we obtained all 23 reference genomes of Anura species from GenBank, and discarded three  
35 low-quality genomes with Scaffold N50 shorter than 2000-bp (Dataset S1). Previously determined  
36 *Tas2r* intact protein sequences of vertebrates (1, 2) were used as queries, and the tblastn program  
37 was used to align and search against the anuran genomes with an E-value cutoff of  $1e^{-10}$ . The  
38 tblastn hits with a length longer than 270 amino acids were retained for subsequent analysis  
39 following previous studies (1, 2), and both ends of each hit were extended by 500-bp to determine  
40 the correct start and stop codons. We identified intact genes that were characterized by an intact  
41 open reading frame and a full-length coding region. Next, the TMHMM method (3) was used to  
42 predict transmembrane domains of the identified intact genes to ensure that they have the complete  
43 seven transmembrane domains to perform normal bitter taste functions. Finally, we used the blastp  
44 program to check whether the best hit is a bitter receptor gene, and determined the final set of bitter  
45 receptor genes. All *Tas2r* gene sequences of Anura species are provided in Dataset S2. For  
46 convenience, we named each *Tas2r* gene numerically following the order in which they were  
47 identified.

48  
49 Moreover, we reconstructed a *Tas2r* gene tree of vertebrates to ensure phylogenetic affinities of  
50 the newly identified genes. The data set included published genes obtained from Li and Zhang  
51 (2014) (2) and newly identified genes from 20 frog species in this study. Multiple sequence  
52 alignment of all deduced protein sequences was performed using the L-INS-I strategy in MAFFT  
53 v7.123b (4, 5), and poorly aligned regions were removed using Gblocks v0.91 (6). The fish  
54 vomeronasal pheromone receptor gene *V1R3* (GenBank accession number: BAM35766) was  
55 selected as the outgroup. ModelFinder (7) was used to predict the optimal nucleotide substitution  
56 model. Phylogenetic reconstruction of *Tas2rs* was carried out using the maximum likelihood (ML)  
57 method in IQ-TREE v2.1.4 (8). Bootstrap values of each node were evaluated via the Ultrafast  
58 Bootstrap approximation algorithm with 10,000 replicates (9). Finally, the phylogenetic tree was  
59 visualized using the online website iTOL (10). The phylogenetic tree showed that six species of  
60 fish, as the basal clade of the whole tree, are the sister groups to frogs and other vertebrates  
61 (Dataset S5), suggesting that our newly identified genes from 20 frog genomes are indeed *Tas2r*  
62 genes.

63  
64 **Sample collection, RNA isolation, library preparation and sequencing.** Six similarly sized  
65 tadpoles and six similarly sized adult American bullfrogs were sampled in a farm from Nanchong  
66 City, Sichuan Province, China, where this species was raised for food, in August 2020. All  
67 individuals were euthanized in the lab, and their taste tissues were subsequently sampled. The  
68 selected taste tissue of an adult bullfrog contained the tongue's upper surface and oral epithelium,  
69 whereas that of tadpoles included only oral epithelium, as a tongue was not observed at the tadpole  
70 life stage. Six individuals of tadpoles and six individuals of adult bullfrogs were used as biological  
71 replicates for transcriptome analysis. Total RNAs were isolated from the taste tissues using  
72 TRIzol™ Reagent (Invitrogen Corporation, CA, USA) following the manufacturer's protocol. The  
73 quality and quantity of RNA samples were assessed using a NanoDrop (NanoDrop Technologies,  
74 DE, USA) instrument. Total RNAs were sent to OrigenGene Biomedical Technology Co. Ltd.  
75 (Shanghai, China) for RNA-seq library preparation using the Illumina Truseq RNA Sample  
76 Preparation Kit (San Diego, CA, USA). Details of library preparation are previously described (11).  
77 Twelve libraries were sequenced to produce 125-bp paired-end reads on the Illumina HiSeq 2500  
78 platform. All experimental protocols on bullfrogs were reviewed and approved by the Ethics  
79 Committee of Wuhan University.

80  
81 **Transcriptome assembly and differential gene expression analysis.** The transcriptome  
82 analysis workflow followed a previous study (12). The raw data of paired-end sequencing was  
83 quality-controlled and filtered using Fastp v0.23.0 (13), and reads with a Phred quality score less

84 than 40 ( $q < 40$ ) were removed. Clean data was mapped to the American bullfrog reference genome  
85 (GenBank assembly accession: GCA\_002284835.2) using Hisat2 v2.1.0 (14, 15) with default  
86 parameters. SAMtools v1.4 (16) was used to sort and convert the alignments generated by Hisat2  
87 into BAM format files. Transcript assembly and quantification were performed using StringTie  
88 v2.1.4 (17). Differential gene expression analysis was performed in the R package DESeq2 (18),  
89 using a generalized linear model with the Wald statistical test by assuming that underlying gene  
90 expression data were distributed following a negative binomial distribution. Differentially expressed  
91 genes (DEGs) were identified between tadpoles and adults. To minimize sequencing noise, our  
92 differential expression analysis used the threshold as follows: absolute fold change greater than 2,  
93 and adjusted p-value smaller than 0.05. This method could substantially reduce the impact of the  
94 variability in the read counts among individual samples (18), although such variability seems rather  
95 large (Fig. 2A). Eventually, a total of 33 differentially expressed *Tas2rs* in the American bullfrog  
96 were identified, using the above threshold, of which 11 were preferentially expressed in tadpoles  
97 and 22 were preferentially expressed in adults. Specifically, the 11 preferentially expressed genes  
98 in tadpoles refer to those showing a significantly higher expression level in tadpoles than in adults,  
99 whereas the 22 preferentially expressed genes in adults showed a significantly higher expression  
100 level in adults than in tadpoles. Heatmaps of *Tas2r* expression levels were constructed using  
101 TBtools based on normalized transcripts per million (TPM) values using the zero-to-one method at  
102 row scale (19). The raw TPM values are also shown in Dataset S3.

103

104 **Selection criteria of functionally tested *Tas2r* genes.** In order to select representative genes for  
105 functional experiments, we constructed a ML phylogenetic tree based on the Ultrafast Bootstrap  
106 approximation algorithm with 10,000 replicates (Dataset S4), and then selected the DEGs based  
107 on their phylogenetic positions, because genes with different clustering relationships may represent  
108 different functions. Eventually, a total of 11 DEGs were selected, including 6 preferentially  
109 expressed in tadpoles (*Tas2r1*, *Tas2r26*, *Tas2r32*, *Tas2r55*, *Tas2r99* and *Tas2r127*) and 5  
110 preferentially expressed in adults (*Tas2r16*, *Tas2r38*, *Tas2r137*, *Tas2r143* and *Tas2r175*) (Dataset  
111 S4).

112

113 **Bitter compounds.** Most bitter compounds in nature come from plants, and the main categories  
114 contained in plants are glycosides or alkaloids (20, 21). The bitter compound collection in this study  
115 contains 10 representatives of natural compounds from plants (amygdalin, arbutin, camphor,  
116 chloramphenicol, papaverine hydrochloride, picrotoxinin, quinine hydrochloride dihydrate, D-salicin,  
117 helicin and yohimbine hydrochloride) (Dataset S6). These substances have been determined to be  
118 bitter and were recorded in BitterDB (22). Unfortunately, we cannot completely differentiate bitter  
119 substances derived from the diets between tadpoles and adult bullfrogs. In addition, nearly no  
120 literature provided evidence on bitter receptors that could sense bitter compounds uniquely derived  
121 from insects. Based on these limitations, this study only selected bitter compounds from plants to  
122 explore the dietary differences between tadpoles and adults. However, it is worth noting that insects  
123 often sequester secondary metabolites (bitter compounds) from consumed plants to serve as their  
124 own defense systems (23, 24), thus insectivorous adult bullfrogs must encounter many bitter  
125 compounds in their insect diets initially derived from plants. All compounds in this study were  
126 purchased from Sigma-Aldrich. The compounds were dissolved in Dulbecco's phosphate-buffered  
127 saline (DPBS) or a mixture of dimethyl sulfoxide (DMSO) at a final DMSO concentration of <0.1%  
128 to protect transfected cells from toxicity. The highest concentrations of bitter compounds used in  
129 our study were based on Meyerhof et al. (2010) (25).

130

131 **Construction of *Tas2r* expression plasmids.** The full-length coding sequences of *Tas2rs* were  
132 sent to GenScript (Nanjing, China) for chemical synthesis, afterwards they were inserted into the  
133 expression vector pEAK10 with the Kozak sequence introduced before the start codon. All  
134 constructs were verified by Sanger sequencing.

135

136 **Functional assays of *Tas2rs*.** Human embryonic kidney 293 (HEK293) cells (PEAKrapid) were  
137 purchased from ATCC (American Type Culture Collection) and cultured in Opti-MEM supplemented

138 with 5% fetal bovine serum (FBS). The cells were seeded uniformly in 96-well plates at a density  
139 of 45,000–50,000 per well. After 24–26 hours, the HEK293 cells were transiently transfected by a  
140 *Tas2r* construct (0.1 µg/well) with a coupling chimeric G protein Gα16-gust44 (0.1 µg/well) using  
141 Lipofectamine 2000 (0.5 µL/well). Cells transfected with Gα16-gust44 only were used as negative  
142 controls. After six hours of expression, the serum-free medium was changed to Opti-MEM with 5%  
143 FBS. After 24 hours of transfection, the culture medium was removed. Cells were washed once  
144 with DPBS buffer, and then loaded with the calcium-sensitive dye Fluo-4 AM (2.5 µM, Invitrogen).  
145 One hour later, the dye solution Fluo-4 AM was removed and cells were washed two more times  
146 with DPBS buffer and placed in the dark for 30 minutes. Finally, cells were assayed in a FlexStation  
147 III reader (Molecular Devices) to monitor the fluorescence changes every two seconds for two  
148 minutes. After 30 minutes of reading, we added a bitter compound solution to record the change of  
149 relative fluorescence units (excitation at 488 nm, emission at 525 nm, cut-off at 515 nm). All  
150 measurements were independently repeated at least three times. Calcium mobilization was  
151 quantified as the ratio of the changes in fluorescence ( $\Delta F$ ) relative to F (the peak of fluorescence  
152 minus baseline fluorescence) from triplicate experiments. Calcium signal traces and bar graphs  
153 were generated using GraphPad Prism 9, and Student's *t*-tests were used for statistical analysis  
154 (\**P* < 0.05, \*\**P* < 0.01, \*\*\**P* < 0.001). In these assays, human *Tas2r16* was selected as the positive  
155 control, because it has been determined to be sensitive to many known bitter ligands (26, 27).  
156  
157

158 **Legend for Dataset S1 (separate file).** Number of intact *Tas2r* genes in vertebrates.

159 **Legend for Dataset S2 (separate file).** All newly determined *Tas2r* nucleotide sequences of Anura  
160 (frogs and toads) in this study.

161 **Legend for Dataset S3 (separate file).** TPM (transcripts per million) values of the American  
162 bullfrog *Tas2r* genes in differential gene expression analysis.

163 **Legend for Dataset S4 (separate file).** Phylogenetic tree of the 180 *Tas2r* genes identified from  
164 the genome sequence of the American bullfrog, rooted using a fish *V1R3* (accession number:  
165 BAM35766).

166 **Legend for Dataset S5 (separate file).** Phylogenetic tree of *Tas2r* genes in vertebrates.  
167 Vertebrate *Tas2r* sequences were obtained from the supplementary data of Li and Zhang (2014),  
168 except for those of the 20 frogs examined in this study.

169 **Legend for Dataset S6 (separate file).** Ten bitter compounds and their concentrations used in our  
170 assays.

171

172

## 173 **SI References**

174

175 1. H. Jiao, Y. Wang, L. Zhang, P. Jiang, H. Zhao, Lineage-specific duplication and adaptive  
176 evolution of bitter taste receptor genes in bats. *Mol. Ecol.* **27**, 4475–4488 (2018).

177 2. D. Li, J. Zhang, Diet shapes the evolution of the vertebrate bitter taste receptor gene  
178 repertoire. *Mol. Bio. Evol.* **31**, 303–309 (2014).

179 3. A. Krogh, B. Larsson, G. Von Heijne, E. L. Sonnhammer, Predicting transmembrane  
180 protein topology with a hidden Markov model: application to complete genomes. *J. Mol.*  
181 *Biol.* **305**, 567–580 (2001).

182 4. K. Katoh, D. M. Standley, MAFFT multiple sequence alignment software version 7:  
183 improvements in performance and usability. *Mol. Biol. Evol.* **30**, 772–780 (2013).

- 184  
185  
186  
187  
188  
189  
190  
191  
192  
193  
194  
195  
196  
197  
198  
199  
200  
201  
202  
203  
204  
205  
206  
207  
208  
209  
210  
211  
212  
213  
214  
215  
216  
217  
218  
219  
220  
221  
222  
223  
224  
225  
226  
227  
228  
229  
230  
231  
232  
233  
234  
235  
236
5. K. Katoh, K. Misawa, K. i. Kuma, T. Miyata, MAFFT: a novel method for rapid multiple sequence alignment based on fast Fourier transform. *Nucleic Acids Res.* **30**, 3059–3066 (2002).
  6. J. Castresana, Selection of conserved blocks from multiple alignments for their use in phylogenetic analysis. *Mol. Biol. Evol.* **17**, 540–552 (2000).
  7. S. Kalyaanamoorthy, B. Q. Minh, T. K. Wong, A. Von Haeseler, L. S. Jermin, ModelFinder: fast model selection for accurate phylogenetic estimates. *Nat. Methods* **14**, 587–589 (2017).
  8. L.-T. Nguyen, H. A. Schmidt, A. Von Haeseler, B. Q. Minh, IQ-TREE: a fast and effective stochastic algorithm for estimating maximum-likelihood phylogenies. *Mol. Biol. Evol.* **32**, 268–274 (2015).
  9. D. T. Hoang, O. Chernomor, A. Von Haeseler, B. Q. Minh, L. S. Vinh, UFBoot2: improving the ultrafast bootstrap approximation. *Mol. Biol. Evol.* **35**, 518–522 (2018).
  10. I. Letunic, P. Bork, Interactive Tree Of Life (iTOL) v5: an online tool for phylogenetic tree display and annotation. *Nucleic Acids Res.* **49**, W293–W296 (2021).
  11. G.-H. Lin *et al.*, Transcriptome sequencing and phylogenomic resolution within Spalacidae (Rodentia). *BMC Genomics* **15**, 1–9 (2014).
  12. M. Pertea, D. Kim, G. M. Pertea, J. T. Leek, S. L. Salzberg, Transcript-level expression analysis of RNA-seq experiments with HISAT, StringTie and Ballgown. *Nat. Protoc.* **11**, 1650–1667 (2016).
  13. S. Chen, Y. Zhou, Y. Chen, J. Gu, fastp: an ultra-fast all-in-one FASTQ preprocessor. *Bioinformatics* **34**, i884–i890 (2018).
  14. D. Kim, B. Langmead, S. L. Salzberg, HISAT: a fast spliced aligner with low memory requirements. *Nat. Methods* **12**, 357–360 (2015).
  15. D. Kim, J. M. Paggi, C. Park, C. Bennett, S. L. Salzberg, Graph-based genome alignment and genotyping with HISAT2 and HISAT-genotype. *Nat. Biotechnol.* **37**, 907–915 (2019).
  16. H. Li *et al.*, The sequence alignment/map format and SAMtools. *Bioinformatics* **25**, 2078–2079 (2009).
  17. M. Pertea *et al.*, StringTie enables improved reconstruction of a transcriptome from RNA-seq reads. *Nat. Biotechnol.* **33**, 290–295 (2015).
  18. M. I. Love, W. Huber, S. Anders, Moderated estimation of fold change and dispersion for RNA-seq data with DESeq2. *Genome Biol.* **15**, 1–21 (2014).
  19. C. Chen *et al.*, TBtools: an integrative toolkit developed for interactive analyses of big biological data. *Mol. Plant* **13**, 1194–1202 (2020).
  20. A. Drewnowski, C. Gomez-Carneros, Bitter taste, phytonutrients, and the consumer: a review. *Am. J. Clin. Nutr.* **72**, 1424–1435 (2000).
  21. W. Meyerhof, Elucidation of mammalian bitter taste. *Rev. Physiol. Biochem. Pharmacol.* **154**, 37–72 (2005).
  22. A. Wiener, M. Shudler, A. Levit, M. Y. Niv, BitterDB: a database of bitter compounds. *Nucleic Acids Res.* **40**, D413–D419 (2012).
  23. S. S. Duffey, Sequestration of plant natural products by insects. *Annu. Rev. Entomol.* **25**, 447–477 (1980).
  24. S. P. Wooding, V. A. Ramirez, M. Behrens, Bitter taste receptors: Genes, evolution and health. *Evol. Med. Pub. Health* **9**, 431–447 (2021).
  25. W. Meyerhof *et al.*, The molecular receptive ranges of human TAS2R bitter taste receptors. *Chem. Senses* **35**, 157–170 (2010).
  26. B. Bufe, T. Hofmann, D. Krautwurst, J.-D. Raguse, W. Meyerhof, The human TAS2R16 receptor mediates bitter taste in response to  $\beta$ -glucopyranosides. *Nat. Genet.* **32**, 397–401 (2002).
  27. H. Imai *et al.*, Functional diversity of bitter taste receptor TAS2R16 in primates. *Biol. Letters* **8**, 652–656 (2012).
